# Supplementary material for: Mechanochemical solid-state vinyl polymerization with anionic initiator
Source: Royal Society of Chemistry journal article supplement (doi:10.1039/d2fd00080f), 2022-05-26
Supplement: d2fd00080f1.pdf [file d2fd00080f1.pdf]

## Supplementary Information for:

### **Mechanochemical Solid-State Vinyl Polymerization with Anionic Initiator**

Kwangho Yoo<sup>a,b,†</sup>, Gue Seon Lee<sup>a,†</sup>, Hyo Won Lee<sup>a,†</sup>, Byeong-Su Kim<sup>b</sup>, and Jeung Gon Kim<sup>\*,a</sup>

<sup>a</sup> Department of Chemistry and Research Institute of Physics and Chemistry, Jeonbuk National University, Jeonju 54896, Republic of Korea.

<sup>b</sup> Department of Chemistry, Yonsei University, Seoul 03722, Republic of Korea.

<sup>†</sup> These authors are contributed equally.

**Table S1.** Mechanochemical radical polymerization of 4-VBP and 4-BPMA without an external initiator  
(Raw Data of Table 1)

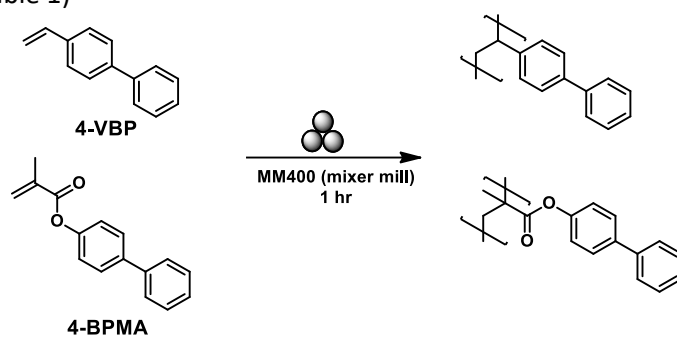

| Entry | Container        | Balls                | Hz | Conv. (%) <sup>[a]</sup> |        |
|-------|------------------|----------------------|----|--------------------------|--------|
|       |                  |                      |    | 4-VBP                    | 4-BPMA |
| 1-1   | Zirconia (10 mL) | Zirconia 8 mm, 2 ea  | 30 | 99                       | 97     |
| 1-2   |                  |                      |    | 99                       | 93     |
| 2-1   | Zirconia (10 mL) | Zirconia 8 mm, 2 ea  | 20 | 37                       | < 1    |
| 2-2   |                  |                      |    | 17                       | < 1    |
| 3-1   | Zirconia (10 mL) | Zirconia 10 mm, 1 ea | 20 | 75                       | < 1    |
| 3-2   |                  |                      |    | 66                       | < 1    |
| 4-1   | Zirconia (10 mL) | Zirconia 5 mm, 8 ea  | 20 | < 1                      | < 1    |
| 4-2   |                  |                      |    | < 1                      | < 1    |
| 5-1   | Zirconia (10 mL) | Zirconia 5 mm, 8 ea  | 25 | < 1                      | < 1    |
| 5-2   |                  |                      |    | < 1                      | < 1    |
| 6-1   | Zirconia (10 mL) | Zirconia 5 mm, 8 ea  | 30 | < 1                      | < 1    |
| 6-2   |                  |                      |    | < 1                      | < 1    |

<sup>[a]</sup> Determined by <sup>1</sup>H NMR spectroscopy with CH<sub>2</sub>Br<sub>2</sub> as an internal standard.

**Table S2.** Polymerization of 4-vinyl biphenyl with *s*-BuLi initiator.<sup>[a]</sup> (Raw Data of Table 2)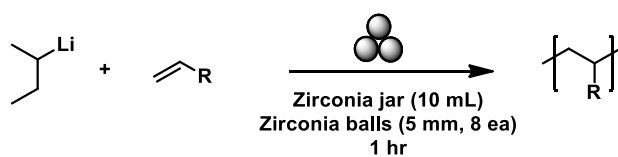

| Entry                          | Monomer | Hz | [M]/[I] | Conv.(%) <sup>[b]</sup> | DP <sub>exp</sub> <sup>[c]</sup> | M <sub>n</sub> <sup>[d]</sup><br>(kg/mol) | M <sub>w</sub> <sup>[d]</sup><br>(kg/mol) | Đ <sup>[d]</sup> |
|--------------------------------|---------|----|---------|-------------------------|----------------------------------|-------------------------------------------|-------------------------------------------|------------------|
| [M]/[I] variation set          |         |    |         |                         |                                  |                                           |                                           |                  |
| 1-1                            | 4-VBP   | 30 | 25      | 99                      | 25                               | 12.6                                      | 23.5                                      | 1.87             |
| 1-2                            |         |    |         | 99                      | 25                               | 12.6                                      | 24.7                                      | 1.96             |
| 2-1                            | 4-VBP   | 30 | 50      | 88                      | 44                               | 36.8                                      | 83.4                                      | 2.27             |
| 2-2                            |         |    |         | 78                      | 39                               | 44.5                                      | 116                                       | 2.60             |
| 3-1                            | 4-VBP   | 30 | 100     | 53                      | 53                               | 110                                       | 282                                       | 2.57             |
| 3-2                            |         |    |         | 55                      | 55                               | 99.9                                      | 254                                       | 2.54             |
| 4-1                            | 4-BPMA  | 30 | 25      | 69                      | 17                               | 35.7                                      | 62.0                                      | 1.74             |
| 4-2                            |         |    |         | 76                      | 19                               | 35.5                                      | 62.4                                      | 1.76             |
| 5-1                            | 4-BPMA  | 30 | 50      | 54                      | 27                               | 42.8                                      | 76.9                                      | 1.80             |
| 5-2                            |         |    |         | 45                      | 23                               | 41.6                                      | 75.7                                      | 1.82             |
| 6-1                            | 4-BPMA  | 30 | 100     | 42                      | 42                               | 44.6                                      | 84.7                                      | 1.90             |
| 6-2                            |         |    |         | 45                      | 45                               | 45.9                                      | 85.5                                      | 1.86             |
| Vibration energy variation set |         |    |         |                         |                                  |                                           |                                           |                  |
| 1-1                            | 4-VBP   | 30 | 50      | 88                      | 44                               | 36.8                                      | 83.4                                      | 2.27             |
| 1-2                            |         |    |         | 78                      | 39                               | 44.5                                      | 116                                       | 2.60             |
| 2-1                            | 4-VBP   | 25 | 50      | 51                      | 26                               | 48.7                                      | 133                                       | 2.73             |
| 2-2                            |         |    |         | 56                      | 28                               | 41.1                                      | 101                                       | 2.46             |
| 3-1                            | 4-VBP   | 20 | 50      | 17                      | 9                                | 47.0                                      | 210                                       | 4.46             |
| 3-2                            |         |    |         | 19                      | 10                               | 135                                       | 309                                       | 2.29             |
| 4-1                            | 4-BPMA  | 30 | 50      | 54                      | 27                               | 42.8                                      | 76.9                                      | 1.80             |
| 4-2                            |         |    |         | 45                      | 23                               | 41.6                                      | 75.7                                      | 1.82             |
| 5-1                            | 4-BPMA  | 25 | 50      | < 1                     | -                                | -                                         | -                                         | -                |
| 5-2                            |         |    |         | 6                       | -                                | -                                         | -                                         | -                |
| 6-1                            | 4-BPMA  | 20 | 50      | < 1                     | -                                | -                                         | -                                         | -                |
| 6-2                            |         |    |         | < 1                     | -                                | -                                         | -                                         | -                |

<sup>[a]</sup> *s*-BuLi solution (1.4 M in cyclohexane) was used. <sup>[b]</sup> Determined by <sup>1</sup>H NMR spectroscopy with CH<sub>2</sub>Br<sub>2</sub> as an internal standard.

<sup>[c]</sup> DP<sub>exp</sub>=[M]/[I] X conversion. <sup>[d]</sup> Determined by SEC calibrated with polystyrene standards in THF at 40°C.

**Table S3.** A raw data of the polymerization time vs. conversion (Raw data of Figure 3)<sup>[a]</sup>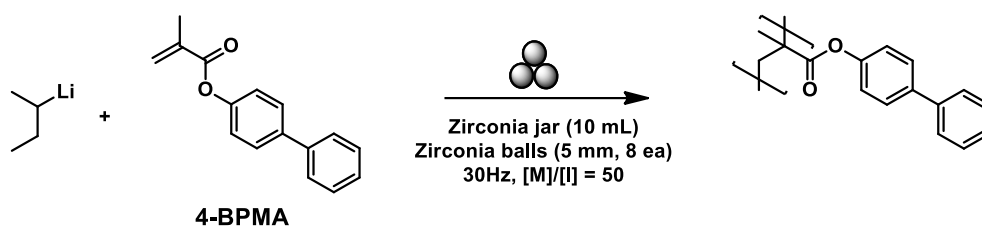

| Entry | Time | Conv.(%) | DP <sub>exp</sub> <sup>[c]</sup> | M <sub>n</sub> <sup>[d]</sup><br>(kg/mol) | M <sub>w</sub> <sup>[d]</sup><br>(kg/mol) | Đ <sup>[d]</sup> |
|-------|------|----------|----------------------------------|-------------------------------------------|-------------------------------------------|------------------|
| 1-1   | 10   | < 1      | -                                | -                                         | -                                         | -                |
| 1-2   |      | < 1      | -                                | -                                         | -                                         | -                |
| 2-1   | 20   | < 1      | -                                | -                                         | -                                         | -                |
| 2-2   |      | 2        | -                                | -                                         | -                                         | -                |
| 3-1   | 30   | 6        | 3                                | 59.6                                      | 89.6                                      | 1.50             |
| 3-2   |      | 8        | 4                                | 62.9                                      | 94.4                                      | 1.50             |
| 4-1   | 40   | 8        | 4                                | 56.0                                      | 70.1                                      | 1.25             |
| 4-2   |      | 13       | 7                                | 55.2                                      | 75.1                                      | 1.36             |
| 5-1   | 50   | 33       | 17                               | 45.6                                      | 78.0                                      | 1.71             |
| 5-2   |      | 33       | 17                               | 45.4                                      | 77.6                                      | 1.71             |
| 6-1   | 60   | 47       | 24                               | 42.7                                      | 76.0                                      | 1.78             |
| 6-2   |      | 56       | 28                               | 45.8                                      | 84.0                                      | 1.83             |
| 7-1   | 90   | 93       | 47                               | 24.6                                      | 59.8                                      | 2.43             |
| 7-2   |      | 93       | 47                               | 24.8                                      | 62.9                                      | 2.53             |
| 8-1   | 120  | 97       | 49                               | 20.4                                      | 47.3                                      | 2.32             |
| 8-2   |      | 97       | 49                               | 20.4                                      | 46.1                                      | 2.26             |

<sup>[a]</sup> *s*-BuLi solution (1.4 M in cyclohexane) was used. <sup>[b]</sup> Determined by <sup>1</sup>H NMR spectroscopy with CH<sub>2</sub>Br<sub>2</sub> as an internal standard.

<sup>[c]</sup> DP<sub>exp</sub>=[M]/[I] X conversion. <sup>[d]</sup> Determined by SEC calibrated with polystyrene standards in THF at 40°C.

**Table S4.** Anion quenching experiments (Raw data of Figure 4.)<sup>[a]</sup>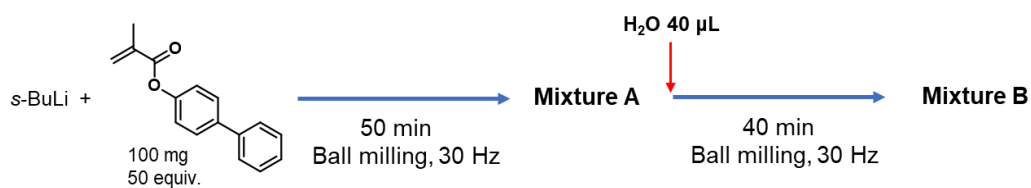

| Entry | Time    | Conv.(%)          | DP <sub>exp</sub> <sup>[b]</sup> | M <sub>n</sub> <sup>[c]</sup><br>(kg/mol) | M <sub>w</sub> <sup>[c]</sup><br>(kg/mol) | $\bar{D}$ |
|-------|---------|-------------------|----------------------------------|-------------------------------------------|-------------------------------------------|-----------|
| 1-1   | 50      | 43 <sup>[d]</sup> | 22                               | 47.3                                      | 89.6                                      | 1.89      |
| 1-2   |         | 38 <sup>[d]</sup> | 19                               | 47.1                                      | 83.0                                      | 1.76      |
| 2-1   | 50 + 40 | 99 <sup>[e]</sup> | 50                               | 12.6                                      | 25.0                                      | 1.99      |
| 2-2   |         | 99 <sup>[e]</sup> | 50                               | 12.7                                      | 25.3                                      | 1.99      |

<sup>[a]</sup>  $s\text{-BuLi}$  solution (1.4 M in cyclohexane) was used. <sup>[b]</sup>  $\text{DP}_{\text{exp}} = [\text{M}]/[\text{I}] \times \text{conversion}$ . <sup>[c]</sup> Determined by SEC calibrated with polystyrene standards in THF at 40°C. <sup>[d]</sup> Determined by  $^1\text{H}$  NMR spectroscopy using conv. (%) =  $1 - [(\text{unreacted 4-BPMA})/(\text{total products})]$  <sup>[e]</sup> Determined by  $^1\text{H}$  NMR spectroscopy with  $\text{CH}_2\text{Br}_2$  as an internal standard.
